# Supplementary material for: Text message-based diabetes self-management support (SMS4BG): study protocol for a randomised controlled trial
Source: Springer Nature journal article supplement (doi:10.1186/s13063-016-1305-5), 2016-04-01
Supplement: MOESM1 [file 10028094]

**Additional file 1:** List of Behaviour Change Techniques utilized in SMS4BG by grouping (BCT Taxonomy v1) [42]

| <b>BCT Grouping</b>                   | <b>BCT</b>                                                   |
|---------------------------------------|--------------------------------------------------------------|
| <b>1. Goals and planning</b>          | 1.1. Goal setting (behavior)                                 |
|                                       | 1.2. Problem solving                                         |
|                                       | 1.3. Action planning                                         |
| <b>2. Feedback and monitoring</b>     | 2.3. Self-monitoring of behaviour                            |
|                                       | 2.4. Self-monitoring of outcome(s) of behaviour              |
| <b>3. Social support</b>              | 3.1. Social support (unspecified)                            |
|                                       | 3.2. Social support (practical)                              |
|                                       | 3.3. Social support (emotional)                              |
| <b>4. Shaping knowledge</b>           | 4.1. Instruction on how to perform the behaviour             |
|                                       | 4.2. Information about Antecedents                           |
| <b>5. Natural consequences</b>        | 5.1. Information about health consequences                   |
|                                       | 5.2. Salience of consequences                                |
|                                       | 5.3. Information about social and environmental consequences |
|                                       | 5.6. Information about emotional consequences                |
| <b>7. Associations</b>                | 7.1. Prompts/cues                                            |
| <b>8. Repetition and substitution</b> | 8.2. Behaviour substitution                                  |
|                                       | 8.4. Habit reversal                                          |
|                                       | 8.7 Graded tasks                                             |
| <b>11. Regulation</b>                 | 11.2. Reduce negative emotions                               |
|                                       | 11.3. Conserving mental resources                            |
| <b>12. Antecedents</b>                | 12.1. Restructuring the physical environment                 |
|                                       | 12.2. Restructuring the social environment                   |
|                                       | 12.4. Distraction                                            |
| <b>13. Identity</b>                   | 13.1. Identification of self as role model                   |
|                                       | 13.2. Framing/reframing                                      |
| <b>15. Self-belief</b>                | 15.1. Verbal persuasion about capability                     |
